# Supplementary material
Source: publisher site journal article supplement (https://www.dovepress.com/article/407179)
Supplement: Supplementary file 1 [file get_supplementary_file.php]

Supplementary Table S1: Primers used for MYBPC3 gene sequencing

| Primer Number | Primer sequence | Base pair size |
| --- | --- | --- |
| MYBPC 2F | GACCTCAGCTCTCTGGAATTCATC | (24 BP) |
| MYBPC 2R | GCTCAGAGGCCACGTCCTCGTCAA | (24 BP) |
| MYBPC 3F | GTGCACGCTCCAACCAG | (17 BP) |
| MYBPC 3R | CAGCAAAGGCAAGAAAGTGTG | (21 BP) |
| MYBPC 4F | CTGGGACGGGGAGGAGAATGTG | (22 BP) |
| MYBPC 4R | GCTTTTGAGACCTGCCCTGGAC | (22 BP) |
| MYBPC 5F | GGGCACCTGCGGTCCCAGCTAACT | (24 BP) |
| MYBPC 5R | ACGCGGGCTGAGAAGGTGATG | (21 BP) |
| MYBPC 6F | CTACCCCTGGAGCCCCCGATGACC | (24 BP) |
| MYBPC 6R | TGCCTCCCAGATTCCCCACACC | (22 BP) |
| MYBPC 7F | CTGGAGCTCCTGGTCTTATGTGAT | (24 BP) |
| MYBPC 7R | GGAGCCGTGACACCAAGATGATAA | (24 BP) |
| MYBPC 8F | GCTTCTCAAACGGCCCCCTCTG | (22 BP) |
| MYBPC 8R | AGCTCCGCCCCGCAAATCATCC | (22 BP) |
| MYBPC 9F | GGGCTGGGGATGATTTG | (17 BP) |
| MYBPC 9R | GGAGGGAGAAAGGGACACTA | (20 BP) |
| MYBPC 10F | AATCTGGCTAGTGTCCCTTTCTCC | (24 BP) |
| MYBPC 10R | AGCCCTTTAACTCCTTCCACACTG | (24 BP) |
| MYBPC 11F | TCGGCCCAACTGACTTA | (17 BP) |
| MYBPC 11R | CCCATGGGCCTTTACTT | (17 BP) |
| MYBPC 12F | CGGCTCCCCACGGACAG | (17 BP) |
| MYBPC 12R | CCCAGGCCAGGCAGGACT | (18 BP) |
| MYBPC 13F | TCCCCAGCCCCTCTTCA | (17 BP) |
| MYBPC 13R | GCCGGACTCCGCTCTTT | (17 BP) |
| MYBPC 14F | GGCGGCACAGAGGGGATTG | (19 BP) |
| MYBPC 14R | ACCGGCAGGAGCAAAAGGATG | (21 BP) |
| MYBPC 15F | ATCCGGCTGACCGTGGAACT | (20 BP) |
| MYBPC 15R | CAGTGCGCCCCGTGATAATC | (20 BP) |
| MYBPC 16F | AACACTTCAACGGCCCCTTCTG | (22 BP) |
| MYBPC 16R | GCCCCCTCCTCCGATACTTCACAC | (24 BP) |
| MYBPC 17F | CGGACGACGCAGCCTACCAGT | (21 BP) |
| MYBPC 17R | GTCAGCTCCACCCCGTCCTTCA | (22 BP) |
| MYBPC 18F | GGAGGAGGGGGCGCAAGTCAAAT | (23 BP) |
| MYBPC 18R | GTCAAAGGCCCAAGGTCACAGAGG | (24 BP) |
| MYBPC 19F | ACAGGCACACGTGTTTTCAC | (20 BP) |
| MYBPC 19R | CAGTCTCCACCTGTCCCATC | (20 BP) |
| MYBPC 20F | AGAATACCAACAAGCCAGGACAAG | (24 BP) |
| MYBPC 20R | GCGGGAAAGTGAGCAGAACC | (20 BP) |
| MYBPC 21F | TGCCTTTGCCCCCGTGCTACTTG | (23 BP) |
| MYBPC 21R | GCCCCAGGACCCCCACTTTTGAT | (23 BP) |
| MYBPC 22F | TCCTCCTGGCTCTCCCGTTTCTCT | (24 BP) |
| MYBPC 22R | GCGCCCCTCTGCTGCTTCTTC | (21 BP) |
| MYBPC 23F | GCTCCTCTGCTCCCTACTTCC | (21 BP) |
| MYBPC 23R | ATGGCCATCAGCACACTTCAC | (21 BP) |
| MYBPC 24F | TCGGTGCCACAGAGATGATTTTGA | (24 BP) |
| MYBPC 24R | GGCTGCCCCTCTGTGTTCTCCA | (22 BP) |
| MYBPC 25F | CCTGTGGCGGTTAGTTGG | (18 BP) |
| MYBPC 25R | CACCGGTAGCTCTTCTTCTTCTTG | (24 BP) |
| MYBPC 26F | CCGAGGGAAGGTGGTGTGG | (19 BP) |
| MYBPC 26R | TCTGTAAAATGCGGCTGAGTATCC | (24 BP) |
| MYBPC 27F | GGAAGTGCCCCCTATGT | (17 BP) |
| MYBPC 27R | TCGCACTGCTCAAAGAAG | (18 BP) |
| MYBPC 28F | TCAGAGGAGTGGGCAGTGGGAGTG | (24 BP) |
| MYBPC 28R | CTGGGGTGTCAATGGCGGGTCTT | (23 BP) |
| MYBPC 29F | GCCTGGAGTTGCTGTGTTAG | (20 BP) |
| MYBPC 29R | GGCTGCCCCTCTTTGGTC | (18 BP) |
| MYBPC 30F | GCGGCCGGCCCTTGGAGT | (18 BP) |
| MYBPC 30R | TGGAAAATGTGAGCTGTGGGTTGG | (24 BP) |
| MYBPC 31F | GCATTCAGGCACTTACCAGGTGACG | (25 BP) |
| MYBPC 31R | CACGGTGAGGACAGTGAAGGGTAGC | (25 BP) |
| MYBPC 32F | GGCCGCAGCTACCCTTCAC | (19 BP) |
| MYBPC 32R | GGCCCCTCTCCCTGTTCC | (18 BP) |
| MYBPC 33F | GGCCTCTCGGTACCAAGTCCTGTC | (24 BP) |
| MYBPC 33R | CAACGTCGGGGCCTGTGAGC | (20 BP) |
| MYBPC 34F | GCAGGGCCATGGTACTCACTCTTG | (24 BP) |
| MYBPC 34R | CCGCCCGCTCTTCCCATCTC | (20 BP) |
| MYBPC 35F | CACAGTGACATGGCCTCCTCTTCT | (24 BP) |
| MYBPC 35R | GCCCCTACAGCCTCCCATTTACT | (23 BP) |

**Supplementary Figure S1. Electropherograms of the SNPs in *MYBPC3* gene observed in Indian HCM and DCM patients**

**
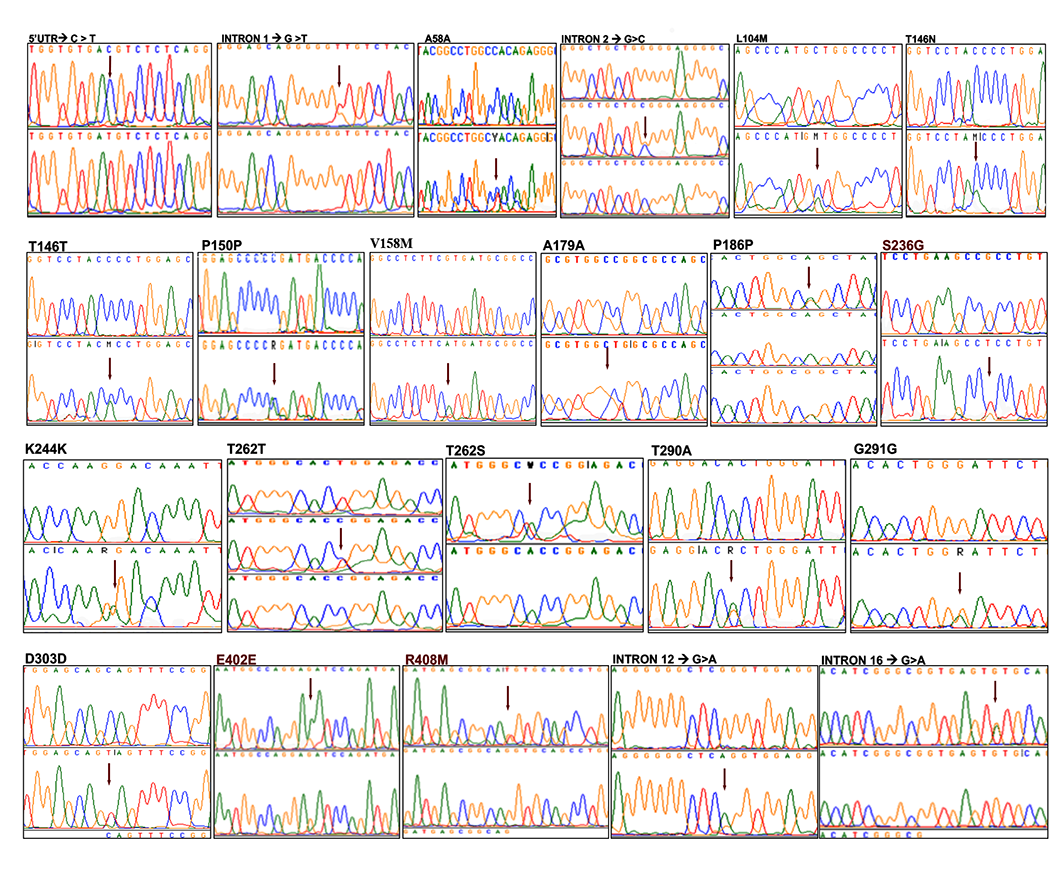
**
